# Supplementary material for: Mixotrophics sulfur disproportionation enhables rapid and low-N2O denitrification in sulfur-packed systems through a novel symbiotic network
Source: Research Square preprint supplement (doi:10.21203/rs.3.rs-8740407/v1), 2026-02-09
Supplement: Supplementary file 1 [file d75b50351c04c9e2d8a5d5d7.docx]

**Supplementary and Additional Material:**

**Mixotrophics sulfur disproportionation enhables rapid and low-N2O denitrification in sulfur-packed systems through a novel symbiotic network**

**Text S1. Details of reactor construction and medium composition**

The reaction zone of the laboratory-scale elemental sulfur-packed bed reactor (S0-PBR) was filled with elemental sulfur with a particle size of 5-8 mm and limestone with a particle size of 3-5 mm at a volume ratio of 2:1. Flaky chemical sulfur (chem-S0) was filled in as the sulfur source, while limestone particles acted as a gradually released alkalinity source for neutralizing acids. Irregular gravel particles at the bottom (with a particle size of 8-16 mm) were placed on a circular porous plate for fluid distribution to withstand the pressure of the column and prevent biomass loss. The test influent was introduced into the reaction zone in an upward flow mode through a peristaltic pump from the bottom of the filter, which contributed to the formation of a closed and strictly anaerobic environment inside the entire reactor and, to a certain extent, was also conducive to the release of denitrification gas products from the top. A pressure gauge was installed at the bottom of the filter to monitor pressure changes during the long-term operation of the filter. An inert gas bag was externally connected to the influent bottle to balance the pressure loss caused by influent changes and maintain a strictly anaerobic environment. The entire reactor was covered with shading cloth to avoid the growth and reproduction of photosynthetic bacteria such as algae.

Experimental Influent and Medium Composition The influent quality during reactor operation was primarily designed to simulate the effluent characteristics of secondary sedimentation tanks in wastewater treatment plants. The nitrate nitrogen (NO₃⁻-N) concentration in the reactor influent was gradually increased from 15 mg/L during the low-concentration startup phase to 40 mg/L. To mimic the complex nature of real wastewater, a mixed carbon source (glucose and sodium acetate mixed at equal carbon contribution) was employed, maintaining a carbon-to-nitrogen (C/N) ratio of 0.8. A synthetic mineral medium supplemented with trace elements was used to support microbial growth. The composition of the medium (per liter) was as follows: potassium nitrate (KNO₃) 0.3607 g; ammonium chloride (NH₄Cl) 0.004 g and 0.019 g; potassium dihydrogen phosphate (KH₂PO₄) 0.005 g; sodium bicarbonate (NaHCO₃) 0.100 g; magnesium chloride (MgCl₂) 0.004 g; sodium acetate (CH₃COONa) 0.0683 g; glucose 0.050 g; and 200 mL of trace element solution. The trace element solution contained (per liter, with pH adjusted to 6.0 by KOH): EDTA 50.0 g; ZnSO4 22.0 g; CaCl2 5.54 g; MnCl2•4H2O 5.06 g; FeSO4 4.99 g; (NH4)2MoO4 1.10 g; CuSO4•5H2O 1.57 g, and CoCl2•6H2O 1.61 g.

**Supplementary Table 1.** Setting of DNA-SIP microcosm experiments.

| **Number** | **Isotope Cultivation Group** | **Microcosm Type** | **Medium Composition** |
| --- | --- | --- | --- |
| 1 | 12C+N+S | C+N+S  (sulfur-mediated mixotrophic denitrification) | 12Ci+12Co+NO3-+S0+Basic Components |
| 2 | 13Ci+N+S | 13Ci+13Co+NO3-+S0+Basic Components |
| 3 | 13Co+N+S | 12Ci+13Co+NO3-+S0+Basic Components |
| 4 | 12C+N | C+N  (heterotrophic denitrification) | 12Ci+12Co+NO3-+Basic Components |
| 5 | 13Ci+N | 13Ci+13Co+NO3-+Basic Components |
| 6 | 13Co+N | 12Ci+13Co+NO3-+Basic Components |
| 7 | 12C+S | C+S  (sulfur disproportionation) | 12Ci+12Co+S0+Basic Components |
| 8 | 13Ci+S | 13Ci+13Co+S0+Basic Components |
| 9 | 13Co+S | 12Ci+13Co+S0+Basic Components |

**Supplementary Table 2.** Primers and references of the eleven genes selected for qPCR quantification.

| **Target**  **gene** | **Primer** | **Primer sequence (5'-3')** | **Annealing temperature** | **References** |
| --- | --- | --- | --- | --- |
| *soxB* | 710F  1184R | ATCGGYCAGGCYTTYCCSTA  MAVGTGCCGTTGAARTTGC | 55 ℃ | (Tourna et al., 2014) |
| *nrfA* | nrfAF2aw  nrfAR1 | CARTGYCAYGTBGARTA  TWNGGCATRTGRCARTC | 53 ℃ | (Welsh et al., 2014) |
| *napA* | V17m  napA-4r | TGGACVATGGGYTTYAAYC  ACYTCRCGHGCVGTRCCRCA | 61 ℃ | (Bru et al., 2007) |
| *nosZ* | Z2F  Z2R | CGCRACGGCAASAAGGTSMSSGT  CAKRTGCAKSGCRTGGCAGAA | 60 ℃ | (Henry et al., 2006) |
| 16S  rRNA | 341F  805F | CCTACGGGNGGCWGCAG  GACTACHVGGGTATCTAATCC | 60 ℃  55 ℃ | (Herlemann et al., 2011) |

**Supplementary Table 3**. Summary statistics of moderate-/high-quality genomic bins assembled from enriched microorganisms on day 300 and isotope-assimilated DNA in the S⁰-PBR.

| **Sample** | **Total number** | **Total len.(bp)** | **Average len.(bp)** | **Max len.(bp)** | **N50 len.(bp)** | **N90 len.(bp)** | **GC(%)** |
| --- | --- | --- | --- | --- | --- | --- | --- |
| mix.bin.10 | 235 | 856374 | 3644.14 | 19330 | 4330 | 1815 | 34.43 |
| mix.bin.100 | 247 | 3313800 | 13416.19 | 106118 | 24269 | 5850 | 68.64 |
| mix.bin.106 | 1071 | 3589981 | 3351.99 | 18691 | 3796 | 1764 | 65.98 |
| mix.bin.111 | 995 | 2900506 | 2915.08 | 33719 | 3035 | 1743 | 63.83 |
| mix.bin.113 | 221 | 2725895 | 12334.37 | 79877 | 19939 | 5379 | 56.6 |
| mix.bin.130 | 1064 | 2638939 | 2480.21 | 9741 | 2504 | 1642 | 70.12 |
| mix.bin.133 | 913 | 3060514 | 3352.15 | 23755 | 3673 | 1821 | 62.32 |
| mix.bin.135 | 84 | 1921673 | 22877.06 | 135633 | 42952 | 11214 | 45.59 |
| mix.bin.14 | 528 | 1653693 | 3131.99 | 15227 | 3502 | 1737 | 35.1 |
| mix.bin.141 | 933 | 2685486 | 2878.33 | 13462 | 3049 | 1722 | 66.83 |
| mix.bin.149 | 168 | 4854377 | 28895.1 | 139366 | 48235 | 13682 | 66.49 |
| mix.bin.152 | 374 | 2291711 | 6127.57 | 42145 | 8848 | 2787 | 64.08 |
| mix.bin.160 | 850 | 3074127 | 3616.62 | 18656 | 4075 | 2026 | 67.65 |
| mix.bin.166 | 806 | 3124646 | 3876.73 | 58608 | 4511 | 1977 | 67.37 |
| mix.bin.169 | 679 | 3837335 | 5651.45 | 51065 | 8173 | 2414 | 69.62 |
| mix.bin.171 | 777 | 2728834 | 3512.01 | 25070 | 3983 | 1857 | 68.65 |
| mix.bin.177 | 297 | 2862594 | 9638.36 | 53863 | 15594 | 4332 | 45.64 |
| mix.bin.178 | 884 | 2977970 | 3368.74 | 13706 | 3655 | 1944 | 60.67 |
| mix.bin.18 | 534 | 2864752 | 5364.7 | 40676 | 6928 | 2661 | 54.73 |
| mix.bin.185 | 479 | 2688473 | 5612.68 | 59044 | 7957 | 2420 | 60.81 |
| mix.bin.187 | 501 | 2043678 | 4079.2 | 22384 | 4846 | 2095 | 56.89 |
| mix.bin.196 | 461 | 1443812 | 3131.91 | 10676 | 3375 | 1852 | 53.79 |
| mix.bin.203 | 390 | 1705599 | 4373.33 | 27843 | 4992 | 2258 | 51.98 |
| mix.bin.210 | 281 | 2673801 | 9515.31 | 52350 | 13242 | 4896 | 60.92 |
| mix.bin.238 | 418 | 2370677 | 5671.48 | 36005 | 9033 | 2438 | 57.44 |
| mix.bin.24 | 272 | 3637332 | 13372.54 | 127554 | 36051 | 4315 | 71.13 |
| mix.bin.257 | 128 | 3099379 | 24213.9 | 178861 | 42227 | 11138 | 56.75 |
| mix.bin.26 | 276 | 3441924 | 12470.74 | 95044 | 21872 | 5642 | 63.83 |
| mix.bin.27 | 1517 | 5565163 | 3668.53 | 35935 | 4200 | 1907 | 62.55 |
| mix.bin.272 | 990 | 5081729 | 5133.06 | 34541 | 7351 | 2285 | 67.73 |
| mix.bin.278 | 1092 | 3061175 | 2803.27 | 12266 | 2902 | 1728 | 67.43 |
| mix.bin.286 | 1511 | 4505471 | 2981.78 | 19561 | 3138 | 1758 | 69.29 |
| mix.bin.294 | 27 | 1873379 | 69384.41 | 231264 | 132977 | 24462 | 33.92 |
| mix.bin.302 | 158 | 571910 | 3619.68 | 27142 | 3881 | 1920 | 32.63 |
| mix.bin.303 | 421 | 1333225 | 3166.81 | 11037 | 3394 | 1783 | 40.46 |
| mix.bin.42 | 187 | 3726851 | 19929.68 | 140831 | 37870 | 8972 | 64.96 |
| mix.bin.46 | 760 | 2403231 | 3162.15 | 22679 | 3415 | 1825 | 62.86 |
| mix.bin.48 | 354 | 2525963 | 7135.49 | 39393 | 9405 | 3472 | 55.95 |
| mix.bin.49 | 701 | 4025489 | 5742.5 | 46292 | 8011 | 2493 | 72.42 |
| mix.bin.5 | 725 | 3294710 | 4544.43 | 92332 | 5425 | 2134 | 68.55 |
| mix.bin.50 | 1417 | 4660893 | 3289.27 | 20866 | 3733 | 1771 | 65.36 |
| mix.bin.54 | 252 | 3074314 | 12199.66 | 72602 | 19337 | 5234 | 56.23 |
| mix.bin.61 | 602 | 4005744 | 6654.06 | 46656 | 9628 | 3132 | 68.36 |
| mix.bin.65 | 656 | 3812447 | 5811.66 | 61044 | 8355 | 2560 | 58.36 |
| mix.bin.66 | 704 | 1743355 | 2476.36 | 11556 | 2503 | 1627 | 63.51 |
| mix.bin.7 | 287 | 2222431 | 7743.66 | 41042 | 11605 | 3482 | 45.28 |
| mix.bin.70 | 1053 | 3078298 | 2923.36 | 18461 | 3027 | 1714 | 35.24 |
| mix.bin.75 | 419 | 1476901 | 3524.82 | 12438 | 4192 | 1909 | 39.05 |
| mix.bin.78 | 496 | 3794514 | 7650.23 | 79771 | 12569 | 3225 | 64.61 |
| mix.bin.79 | 259 | 3460102 | 13359.47 | 80168 | 20955 | 6089 | 67.29 |
| mix.bin.83 | 1171 | 4538691 | 3875.91 | 35487 | 4663 | 2103 | 48.3 |
| mix.bin.84 | 901 | 2426505 | 2693.12 | 8833 | 2821 | 1717 | 66.21 |
| mix.bin.89 | 1019 | 3807434 | 3736.44 | 28297 | 4690 | 1843 | 73.11 |
| mix.bin.90 | 773 | 3400441 | 4399.02 | 20907 | 5400 | 2200 | 59.15 |
| mix.bin.94 | 435 | 1470644 | 3380.79 | 15529 | 3684 | 1882 | 61.17 |

**Supplementary Figure 1.** Transformation patterns of nitrogen and sulfur under various incubation conditions: mixotrophic denitrification (+C+N+S; a, b), autotrophic denitrification (+N+S; c, d), heterotrophic denitrification (+C+N; e), and sulfur disproportionation (+C+S; f).

**Supplementary Figure 2.** Relative contribution of different pathways to nitrate removal.


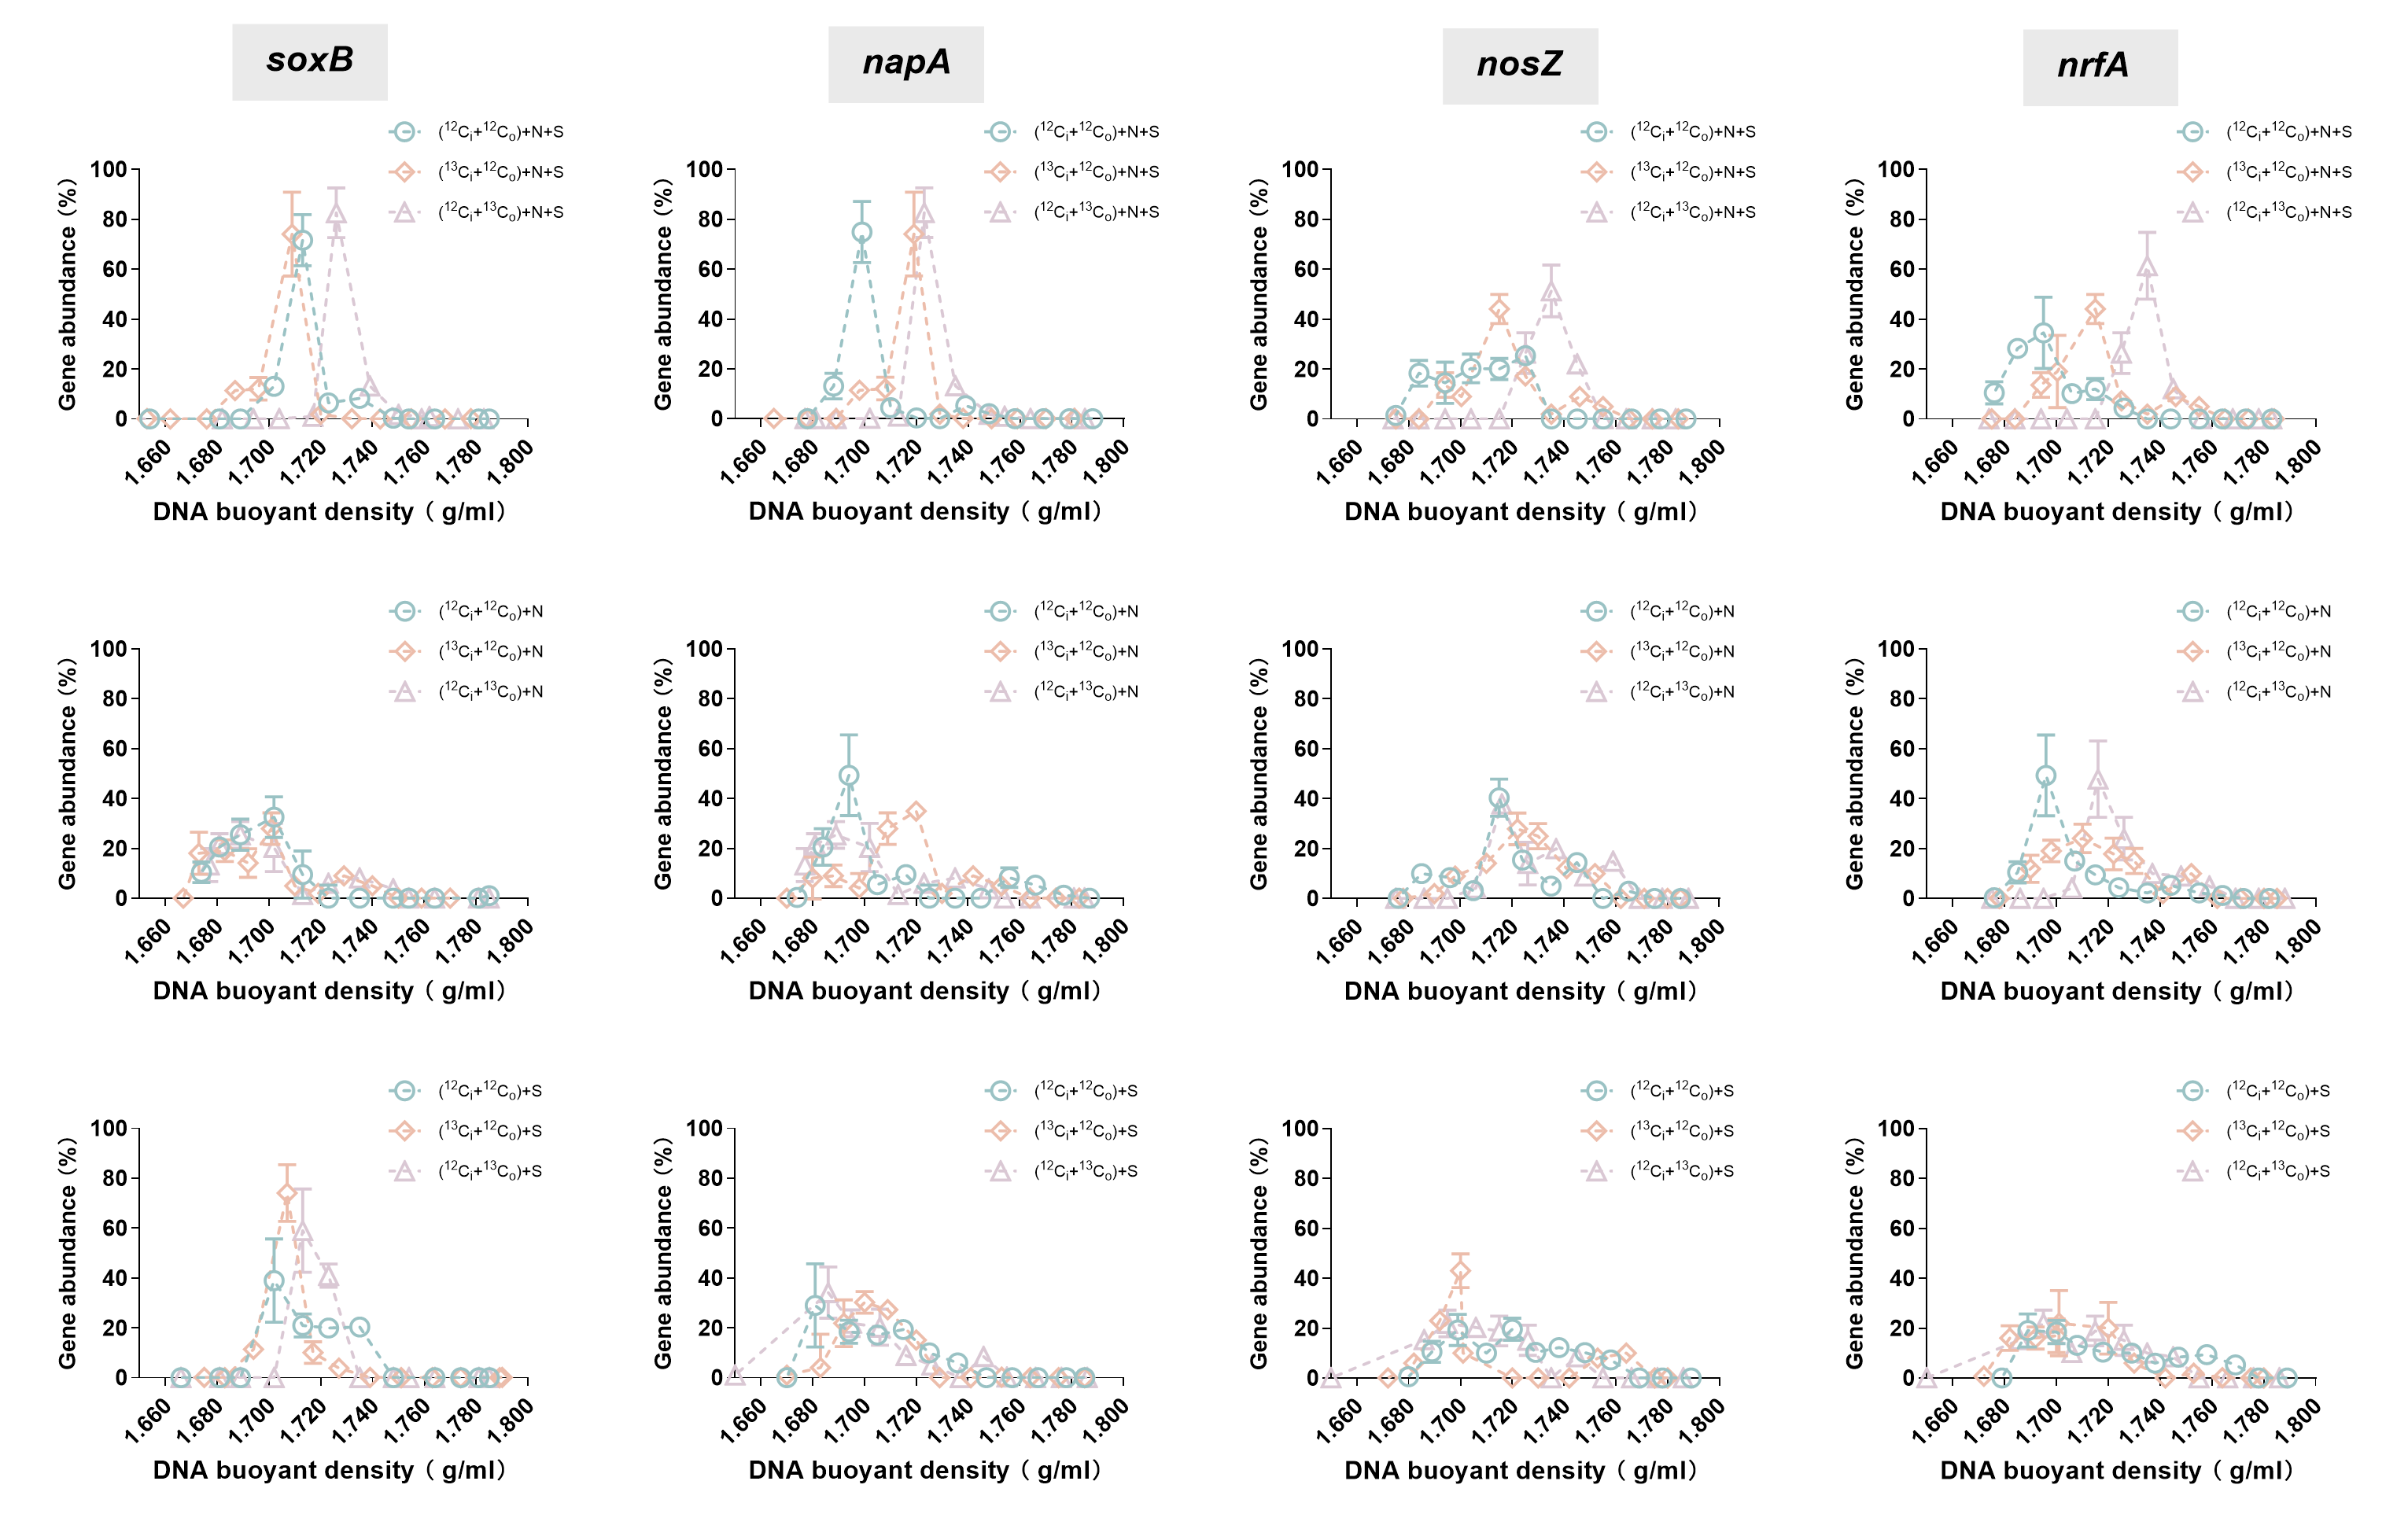


**Supplementary Figure 3.** Complementary gradient gene quantification of key biomarkers involved in nitrogen and sulfur metabolisms. a-d: Dynamic abundance of functional genes along the DNA density gradient in the C+N+S-incubated microcosms.e-h: Dynamic abundance of functional genes along the DNA density gradient in the C+N-treated microcosms.i-l: Dynamic abundance of functional genes along the DNA density gradient in the C+S-incubated microcosms. For each buoyant density fraction, the gene abundance was normalized as a percentage of its copy number relative to the total DNA copy number (sum of the copy numbers across all density fractions).

**Reference:**

Bru, D., Sarr, A., & Philippot, L. (2007). Relative Abundances of Proteobacterial Membrane-Bound and Periplasmic Nitrate Reductases in Selected Environments. *Applied and Environmental Microbiology*, *73*(18), 5971-5974. <https://doi.org/10.1128/AEM.00643-07>

Henry, S., Bru, D., Stres, B., Hallet, S., & Philippot, L. (2006). Quantitative Detection of the nosZ Gene, Encoding Nitrous Oxide Reductase, and Comparison of the Abundances of 16S rRNA, narG, nirK, and nosZ Genes in Soils. *Applied and Environmental Microbiology*, *72*(8), 5181-5189. <https://doi.org/10.1128/AEM.00231-06>

Herlemann, D. P. R., Labrenz, M., Jürgens, K., Bertilsson, S., Waniek, J. J., & Andersson, A. F. (2011). Transitions in bacterial communities along the 2000 km salinity gradient of the Baltic Sea. *The ISME Journal*, *5*(10), 1571-1579. <https://doi.org/10.1038/ismej.2011.41>

Tourna, M., Maclean, P., Condron, L., O'Callaghan, M., & Wakelin, S. A. (2014). Links between sulphur oxidation and sulphur-oxidising bacteria abundance and diversity in soil microcosms based on soxB functional gene analysis. *FEMS Microbiol Ecol*, *88*(3), 538-549. <https://doi.org/10.1111/1574-6941.12323>

Welsh, A., Chee-Sanford Joanne, C., Connor Lynn, M., Löffler Frank, E., & Sanford Robert, A. (2014). Refined NrfA Phylogeny Improves PCR-Based nrfA Gene Detection. *Applied and Environmental Microbiology*, *80*(7), 2110-2119. <https://doi.org/10.1128/AEM.03443-13>
